# Supplementary material
Source: PubMed Central journal article supplement (PMC3219133)
Supplement: 1109355108_pnas.1109355108_SI.pdf [file 1109355108_pnas.1109355108_SI.pdf]

# Supporting Information

Herbert-Read et al. 10.1073/pnas.1109355108

## SI Text

### Iterative Expectation-Maximization Algorithm for Function Fitting.

The first three components of the additive model specified by Eq. 1 (auto-regression, the wall effects, and the first neighbor) were optimized together using expectation-maximization. This involves iteratively fitting one function, assuming the current values of the other two are correct. Let  $F_{AR}^j$  be the  $j$ th iteration of the auto-regression function, and similarly for  $F_W$  and  $F_{N1}$ , then, with the original response data,  $\alpha_i$ :

- Initialize each function to a random state, the zeroth iteration.
- Fit  $F_{AR}^1$  to the adjusted dataset  $\alpha_i - F_W^0 - F_{N1}^0$ .
- Fit  $F_W^1$  to the adjusted dataset  $\alpha_i - F_{AR}^1 - F_{N1}^0$ .
- Fit  $F_{N1}^1$  to the adjusted dataset  $\alpha_i - F_{AR}^1 - F_W^1$ .
- Repeat the cycle to generate iteration 2. Continue iterations until the overall fit at the end of the iteration no longer improves beyond a fixed threshold.

After the first three components have been fitted the functions associated with the positions of the second and third neighbors are then fitted sequentially to the remaining residual.

- Fit  $F_{N2}$  to the adjusted dataset  $\alpha_i - F_{AR}^1 - F_W^1 - F_{N1}^1$ .
- Fit  $F_{N3}$  to the adjusted dataset  $\alpha_i - F_{AR}^1 - F_W^1 - F_{N1}^1 - F_{N2}^1$ .

This ordering prioritizes the first neighbor interaction and represents the prior belief that the fish must interact with the first neighbor if it interacts with the second and must interact with the second if it interacts with the third.

**Stability of Fitting Algorithm.** Because the expectation-maximization algorithm converges to a local maxima of the likelihood, equivalent to a local minima of the square error, we run the algorithm repeatedly from many random initial starting conditions. Many of these local maxima correspond to solutions with very weak interactions with no clear pattern. However, those closest in likelihood and square error to the global maximum resemble the pattern of interaction shown in this paper, particularly the range of interaction and the weak or absent interaction with the second and third neighbors. Randomly removing 10% of the complete dataset before running the algorithm has negligible effect on the optimal solution, which suggests that the results are not due to a small subset of the data.

**Additional Descriptive Statistics.** Fig. S1 reports the histograms of the distance  $d$ , position  $\vartheta$ , and orientation  $\varphi$  at which the nearest neighbor was found with respect to the focal fish. The fish stay relatively close and well aligned to each other and form elongated schools, with most neighbors being in front or behind the focal fish. In spite of the constraints imposed by the experimental setup (which means fish change direction often), the groups remained well polarized, with polarization values (measured as in ref. 38, equation 1) of  $0.84 \pm 0.26$ ,  $0.71 \pm 0.26$ , and  $0.63 \pm 0.25$  (mean  $\pm$  SD) for groups of two, four, and eight fish, respectively.

Most of the time, the fish are aligned with the closest border of the basin (Fig. S3A), though their turning response to the wall (Fig. S3B) is weak and mostly limited to avoiding collisions. (Notice that avoiding collision with a neighbor does not necessarily require a turning response—and indeed we did not find evidence for a repulsion zone in the turning response—because when one of the two fish slows down, the other can move away from the collision zone; on the contrary, avoiding collision with static objects, such as a wall, always requires a turning response.) The fish show an acceleration response to the walls, which consists in speeding up when moving away from the closest wall and slowing down when approaching the wall.

**Correlation Analysis of the Effects of Multiple Neighbors.** Fig. S4 shows the response in acceleration and turning angle of a focal fish to its neighbors, analyzed sequentially per nearest neighbor. It appears that the focal fish is responding to all of its neighbors as its acceleration and turning responses show qualitative similarities between neighbor profiles. As our function fitting shows, however, only the nearest neighbor is necessary in predicting the direction changes of the focal fish (Fig. 5 and Fig. S6).

**Effects of Group Size.** Fig. S5 shows the acceleration and turning angle of a focal fish as a function of the position of its neighbors. As shown, the three group sizes produce qualitatively similar patterns. As shown, standard error increases in the smaller group sizes, probably due to less replication (fewer neighbors) in the smaller group sizes. The amplitude, in both acceleration and turning angle, decreases as group size increases. This is probably due to an effect of averaging multiple interactions in the larger group sizes.

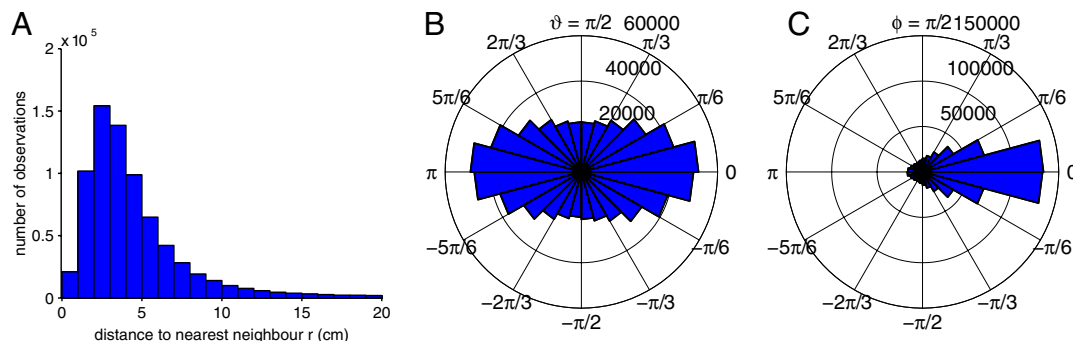

Fig. S1. Descriptive statistics of fish position in relation to other fish. (A) Distribution of distances  $r$  to the nearest neighbor. (B) Distribution of positions of the nearest neighbor. (C) Distribution of relative orientations of the nearest neighbor.
